# Supplementary figures and images for: A microfluidic-based gut-on-a-chip model containing the gut microbiota of patients with depression reveals physiological characteristics similar to depression
Source: Royal Society of Chemistry journal article supplement (doi:10.1039/d3lc01052j), 2024-01-01

**a**

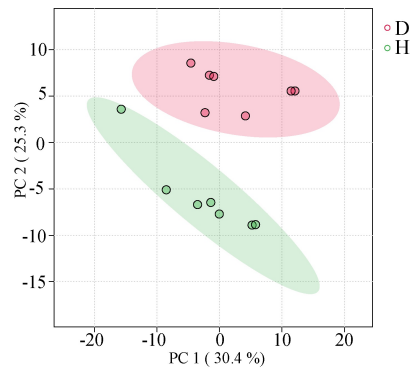

**b**

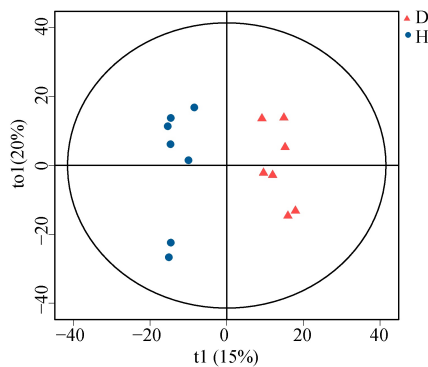

**c**

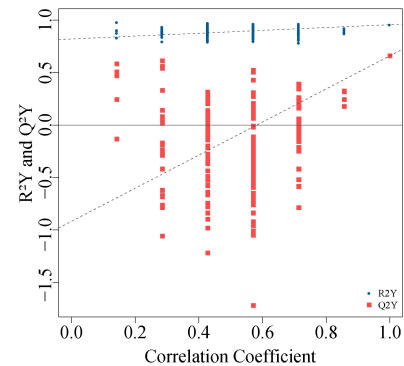

**d**

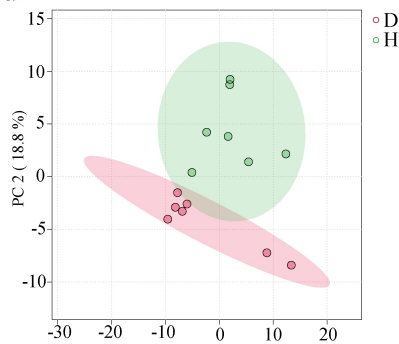

**e**

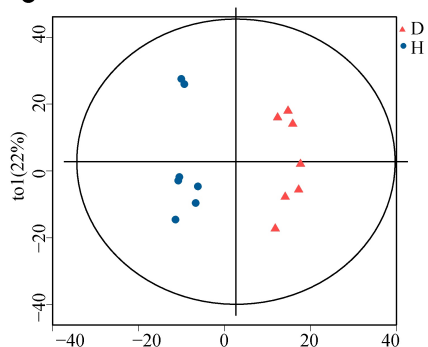

**f**

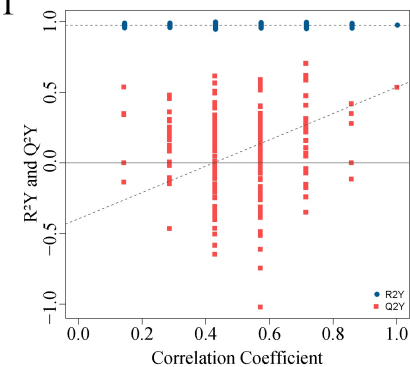

Supplement: d3lc01052j2.pdf [file d3lc01052j2.pdf]

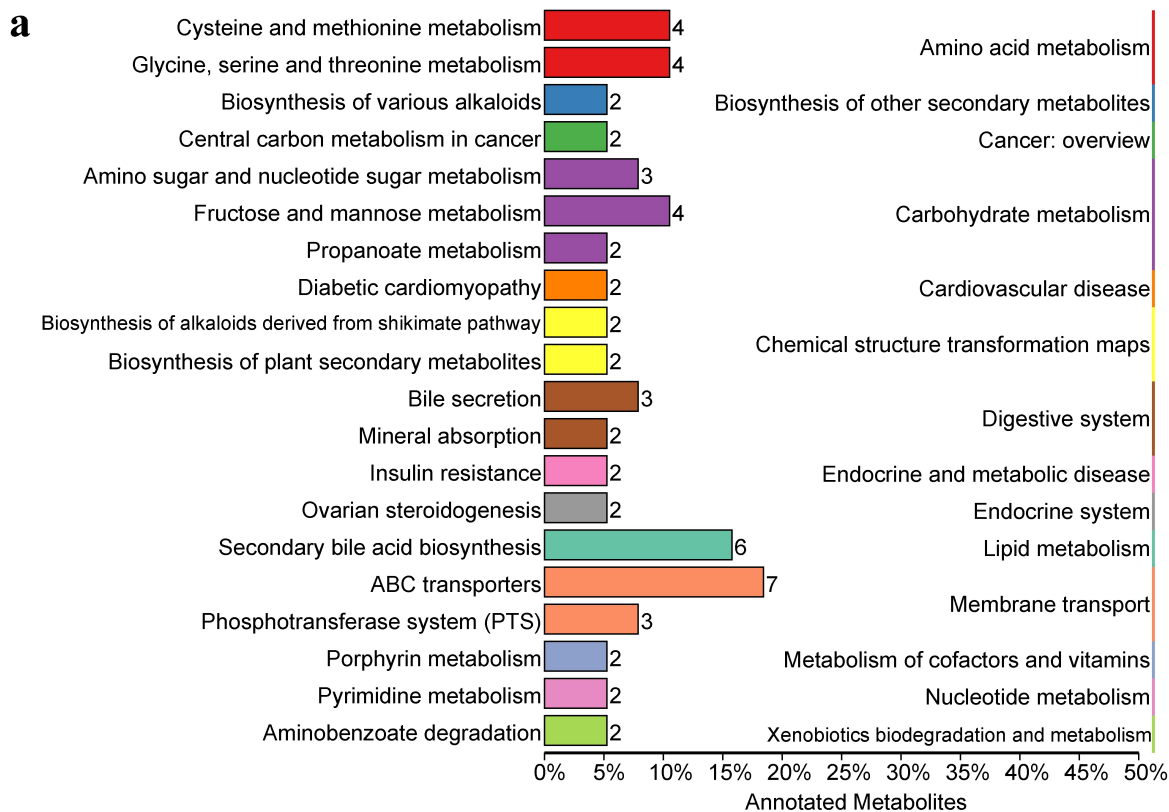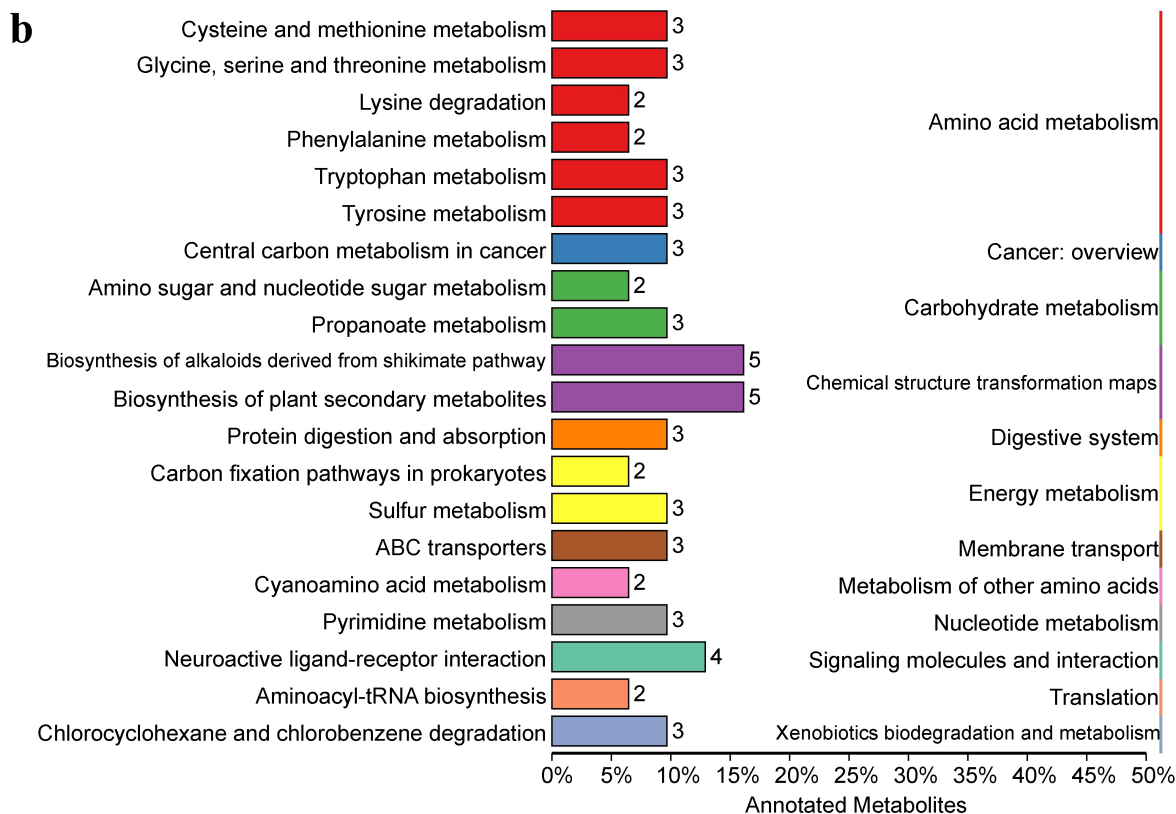

Supplement: d3lc01052j4.pdf [file d3lc01052j4.pdf]
